# Supplementary material for: CoO nanoparticle decorated N-doped carbon nanotubes: a high-efficiency catalyst for nitrate reduction to ammonia
Source: Royal Society of Chemistry journal article supplement (doi:10.1039/d2cc00997h), 2022-01-01
Supplement: d2cc00997h1.pdf [file d2cc00997h1.pdf]

## Electronic Supplementary Information

### Experimental Section

**Materials:** Sodium nitrate ( $\text{NaNO}_3$ , 99.0%), sodium nitrite ( $\text{NaNO}_2$ , 99.0%), ammonium chloride ( $\text{NH}_4\text{Cl}$ ), sodium hydroxide ( $\text{NaOH}$ ), sodium salicylate ( $\text{C}_7\text{H}_5\text{NaO}_3$ ), salicylic acid ( $\text{C}_7\text{H}_6\text{O}_3$ ), trisodium citrate dihydrate ( $\text{C}_6\text{H}_5\text{Na}_3\text{O}_7 \cdot 2\text{H}_2\text{O}$ ), *p*-dimethylaminobenzaldehyde ( $\text{C}_9\text{H}_{11}\text{NO}$ ), sodium nitroferricyanide dihydrate ( $\text{C}_5\text{FeN}_6\text{Na}_2\text{O} \cdot \text{H}_2\text{O}$ ), 7,7,8,8-tetracyanoquinodimethane ( $\text{C}_{12}\text{H}_4\text{N}_4$ ), sulfamic acid solution ( $\text{H}_3\text{NO}_3\text{S}$ ), sodium hypochlorite solution ( $\text{NaClO}$ ),  $\text{Na}^{15}\text{NO}_3$ , deuterium oxide ( $\text{D}_2\text{O}$ ), acetonitrile ( $\text{C}_2\text{H}_3\text{N}$ ), tetrabutylammonium perchlorate ( $\text{C}_{16}\text{H}_{36}\text{ClNO}_4$ ), cobalt nitrate ( $\text{Co}(\text{NO}_3)_2 \cdot 6\text{H}_2\text{O}$ ) and cobalt perchlorate ( $\text{Co}(\text{ClO}_4)_2 \cdot 6\text{H}_2\text{O}$ ) were purchased from Aladdin Ltd. (Shanghai, China). Sulfuric acid ( $\text{H}_2\text{SO}_4$ ), hydrogen peroxide ( $\text{H}_2\text{O}_2$ ), hydrochloric acid ( $\text{HCl}$ ), phosphoric acid ( $\text{H}_3\text{PO}_4$ ), hydrazine monohydrate ( $\text{N}_2\text{H}_4 \cdot \text{H}_2\text{O}$ ) and ethylalcohol ( $\text{C}_2\text{H}_5\text{OH}$ ) were bought from Beijing Chemical Corporation. (China). chemical Ltd. in Chengdu. Graphite paper (GP) was provided by Hongshan District, Wuhan Instrument Surgical Instruments business. All reagents used in this work were analytical grade without further purification.

**Preparation of  $\text{CoO}@\text{NCNT}/\text{GP}$ :**  $\text{CoO}@\text{NCNT}/\text{GP}$  was synthesized by electrodeposition with annealing treatment.<sup>1</sup> Typically, 1.36 g tetrabutylammonium perchlorate ( $\text{C}_{16}\text{H}_{36}\text{ClNO}_4$ ), 14.64 mg cobalt perchlorate ( $\text{Co}(\text{ClO}_4)_2 \cdot 6\text{H}_2\text{O}$ ) and 16.32 mg 7,7,8,8-tetracyanoquinodimethane ( $\text{C}_{12}\text{H}_4\text{N}_4$ ) were dissolved into 40 mL acetonitrile to form a homogeneous electrolyte. The GP (1 cm  $\times$  1.5 cm) was repeatedly wiped with alcohol before electrodeposition. The potentiostatic electrodeposition were performed with a CHI 760E potentiostat (CH Instruments, China) in a standard three-electrode setup with the GP as the working electrode, a graphite rod as the counter electrode, the Ag/AgCl electrode as the reference electrode. After constant-potential operation at -0.2 V vs. Ag/AgCl for 15 min, the precursor was formed. The  $\text{CoO}@\text{NCNT}/\text{GP}$  was obtained by calcining the precursor from room temperature to 400 °C with an increasing rate of 2 °C min<sup>-1</sup> and then kept for 1 h under the Ar

atmosphere.

**Preparation of CoO/GP:** For preparing CoO/GP counterpart, we firstly synthesized Co(OH)<sub>2</sub>. Typically, 0.1 M Co(NO<sub>3</sub>)<sub>2</sub>·6H<sub>2</sub>O solution was used as electrolyte and the Co(OH)<sub>2</sub> were electrodeposited on GP (1 cm × 1.5 cm) under a constant potential of −1.0 V vs Ag/AgCl for 15 min. Then, the Co(OH)<sub>2</sub>/GP was calcined at 200 °C with the increasing rate of 2 °C min<sup>−1</sup> and kept for 2 h in Ar atmosphere to obtain CoO/GP.

**Characterizations:** X-ray diffraction (XRD) data was recorded by a LabX XRD-6100 X-ray diffractometer. Scanning electron microscopy (SEM) and energy-dispersive X-ray (EDX) elemental mapping images were acquired using GeminiSEM 300 (ZEISS, Germany) scanning electron microscope. Transmission electron microscopy (TEM) and high-resolution TEM (HRTEM) images were obtained from FEI Tecnai F20 transmission electron microscopy operated at an accelerating voltage of 200 kV. X-ray photoelectron spectroscopy (XPS) data was collected on an EscaLab Xi+ X-ray photoelectron spectrometer using Al as the exciting source. The absorbance data was measured on SHIMADZU UV-1800 Ultraviolet-visible (UV-Vis) spectrophotometer. H<sub>2</sub> were determined by GC with SHIMADZU GC-2014 gas chromatograph. A GC run was initiated per 1200 s. Argon (99.999%) was used as the carrier gas. A flame ionization detector with a thermal conductivity detector was used to quantify hydrogen and nitrogen. The electrolyzer outlet was introduced into a condenser before being vented directly into the gas sampling loop of the gas chromatograph.

**Electrochemical measurements:** All electrochemical tests were carried using a CHI 760E electrochemical potentiostat in an H-type cell separated by a nafion 117 membrane under an Ar-saturated atmosphere with continuous stirring of 250 rpm. The free-standing CoO@NCNT/GP (geometric area: 0.25 cm<sup>−2</sup>), Hg/HgO and Pt plate were served as the working electrode, reference electrode and counter electrode, respectively. Before test, the nafion membrane was protonated by boiling in H<sub>2</sub>O<sub>2</sub> (5%), 0.5 M H<sub>2</sub>SO<sub>4</sub> and ultrapure water at 80 °C for 1 h one by one. 0.1 M NaOH solution was adopted as the electrolyte and extra 0.1 M NO<sub>3</sub><sup>−</sup> was added as the reactants. All potentials were recorded to reversible hydrogen electrode (RHE) with the following equation: E (RHE)

=  $E(\text{Hg}/\text{HgO}) + (0.098 + 0.0591 \times \text{pH}) V$ . Presented current density and  $\text{NH}_3$  yields was normalized to the geometric surface area.

**Determination of  $\text{NH}_3$ :** We adopt indophenol blue method to quantify the concentration of produced  $\text{NH}_3$ .<sup>2</sup> The electrolytes after 2-h electrolysis were diluted 40 times due to the large concentration of produced  $\text{NH}_3$ . In detail, 2 mL of coloring solution (1 M NaOH containing 5 wt% salicylic acid and 5 wt% sodium citrate), 1 mL of the oxidizing solution (0.05 M sodium hypochlorite solution) and 200  $\mu\text{L}$  catalyst solution (1 wt% sodium nitroferricyanide (III) dehydrate) were added slowly to the 2 mL diluted electrolyte one by one. The UV-Vis absorption spectra were performed at  $\lambda = 665 \text{ nm}$  after the mixed solution standing for 2 h in the dark. The concentration-absorbance curve was calibrated by a series of standard  $\text{NH}_4\text{Cl}$  solutions with different concentration. The fitting curve ( $y = 0.39414x + 0.04382$ ,  $R^2 = 0.9999$ ) shows good linear relation of absorbance value with  $\text{NH}_3$  concentration.

**Determination of  $\text{NO}_2^-$ :** Griess method was adopted to quantify the concentration of  $\text{NO}_2^-$ .<sup>3</sup> The electrolytes were diluted 20 times. In brief, sulfonamide (1.0 g),  $\text{H}_3\text{PO}_4$  (2.94 mL), N-(1-naphthyl)-ethylenediamine dihydrochloride (0.1 g), and deionized water (50 mL) was mixed as a color reagent. Then, 1 mL color reagent and 2 mL  $\text{H}_2\text{O}$  was added into 1 mL electrolyte after 2-h electrolysis. The absorbance was performed at a wavelength of 540 nm after the mixture stand 10 min in dark. The fitting curve ( $y = 0.2211x + 0.03857$ ,  $R^2 = 0.9998$ ) shows good linear relation of absorbance value with  $\text{NO}_2^-$  concentration.

**Determination of  $\text{N}_2\text{H}_4$ :** The Watt and Chrisp method was adopted to detect the  $\text{N}_2\text{H}_4$  in the electrolyte.<sup>4</sup> In detail,  $\text{C}_9\text{H}_{11}\text{NO}$  (5.99 g),  $\text{HCl}$  (30 mL) and  $\text{C}_2\text{H}_5\text{OH}$  (300 mL) was mixed to form a uniform solution used as a color reagent. Then, 1 mL color reagent was added into 1 mL electrolyte after 2 h electrolysis. The absorbance was performed at a wavelength of 455 nm after the mixture stand 20 min in dark. The fitting curve ( $y = 0.8465x + 0.1001$ ,  $R^2 = 0.998$ ) shows good linear relation of absorbance value with  $\text{N}_2\text{H}_4$  concentration.

**Determination of  $\text{NO}_3^-$ :** The electrolytes were diluted to the detection range. In brief,

0.1 mL 1 M HCl and 0.01 mL 0.8 wt% sulfamic acid solution were added into 5 mL diluted electrolyte. The absorption spectrum was measured using a UV-Vis spectrophotometer and the absorption intensities at a wavelength of 220 nm and 275 nm were recorded. The final absorbance value was calculated by this equation:  $A = A_{220\text{nm}} - 2A_{275\text{nm}}$ . The calibration curve can be obtained through different concentrations of  $\text{NaNO}_3$  solutions and the corresponding absorbance. The fitting curve ( $y = 0.05425x + 0.00388$ ,  $R^2 = 0.999$ ) shows good linear relation of absorbance value with  $\text{NO}_3^-$  concentration.

**$^{15}\text{N}_2$  isotope labeling experiments:** The  $^{15}\text{N}$  isotopic labeling experiment was conducted to confirm the N source of produced  $\text{NH}_3$ . After electrolysis in Ar-saturated 0.1 M NaOH with 0.1 M  $^{15}\text{NO}_3^-$  at  $-0.6$  V for 2 h, the pH of the obtained electrolyte was adjusted to be 2 with a 0.5 M  $\text{H}_2\text{SO}_4$  solution. Then, 1 mL of electrolyte, 0.2 mL of DMSO and 0.2 mL of  $\text{D}_2\text{O}$  were added into the NMR tube for further NMR detection. The method for detecting the  $^{14}\text{NH}_3$  is similar to this method except using the  $^{14}\text{NO}_3^-$  as the reactants.

#### **Determination of FE, $\text{NH}_3$ yield and selectivity:**

$$\text{FE} = n \times F \times C \times V / (M \times Q) \times 100\%$$

$$\text{Yield} = C \times V / (17 \times t \times A)$$

$$\text{Selectivity} = [\text{NH}_3] / \Delta[\text{NO}_3^-] \times 100\%$$

Where n represent the number of electrons transferred for  $\text{NO}_3\text{RR}$  (the reduction of  $\text{NO}_3^-$  to  $\text{NH}_3$  consumes 8 electrons), F is the Faraday constant ( $96485 \text{ C mol}^{-1}$ ), C is the concentration of produced  $\text{NH}_3$  calculated by fitting curves, V is the volume of cathodic reaction electrolyte (40 mL), M is the relative molecular mass of  $\text{NH}_3$ , Q is the total quantity of applied electricity, t is the reduction time (2 h), and A is the geometric area of working electrode ( $0.25\text{cm}^2$ ).  $\Delta[\text{NO}_3^-]$  is the concentration difference of  $\text{NO}_3^-$  before and after electrolysis.

#### **Computational details:**

First-principles calculations were performed by using the Vienna Ab initio Simulation Package (VASP)<sup>5-8</sup> to investigate the  $\text{NO}_3\text{RR}$  process on CoO surface. The valence-

core electrons interactions were treated by Projector Augmented Wave (PAW)<sup>9</sup> potentials and the electron exchange correlation interactions were described by the generalized gradient approximation (GGA) with the Perdew-Burke-Ernzerhof (PBE)<sup>10</sup> functional. Considered long-range interaction at the interface, Van der Waals interactions were considered using DFT-D3 correlation.<sup>11</sup> To avoid interaction come from other slabs, a vacuum of 20 Å was added along z direction. The convergence criterion of geometry relaxation was set to 0.03 eV•Å<sup>-1</sup> in force on each atom. The energy cutoff for plane wave-basis was set to 500 eV. The K points were sampled with 3×3×1 by Monkhorst-Pack method.<sup>12</sup>

Gibbs free energy change ( $\Delta G$ ) was evaluated based on the computational hydrogen electrode (CHE) model, which takes one-half of the chemical potential of gaseous hydrogen under standard conditions as the free energy of the proton-electron pairs.  $\Delta G$  were calculated by the following equation<sup>13</sup>:

$$\Delta G = \Delta E + \Delta E_{\text{ZPE}} - T\Delta S + neU$$

where  $\Delta E$ ,  $\Delta E_{\text{ZPE}}$ ,  $\Delta S$  are the reaction energy from DFT calculation, the correction of zero-point energy and the change of simulated entropy, respectively.  $T$  is the temperature ( $T = 300$  K).  $n$  and  $U$  are the number of transferred electrons and applied potential respectively.

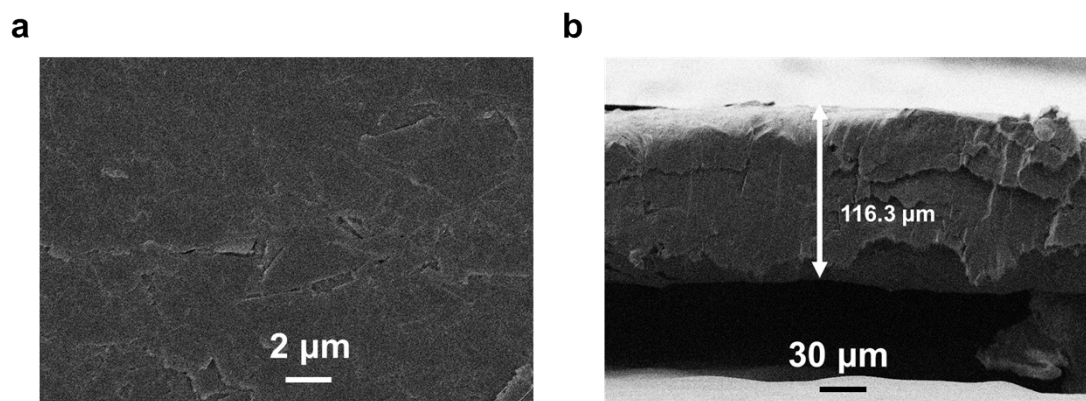

**Fig. S1.** (a) Top-view and (b) side-view SEM images of bare GP.

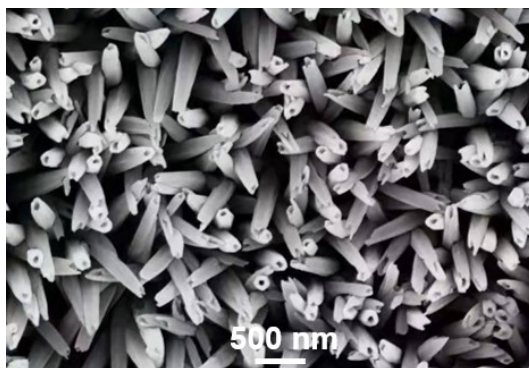

**Fig. S2.** SEM image of the precursor of CoO@NCNT/GP.

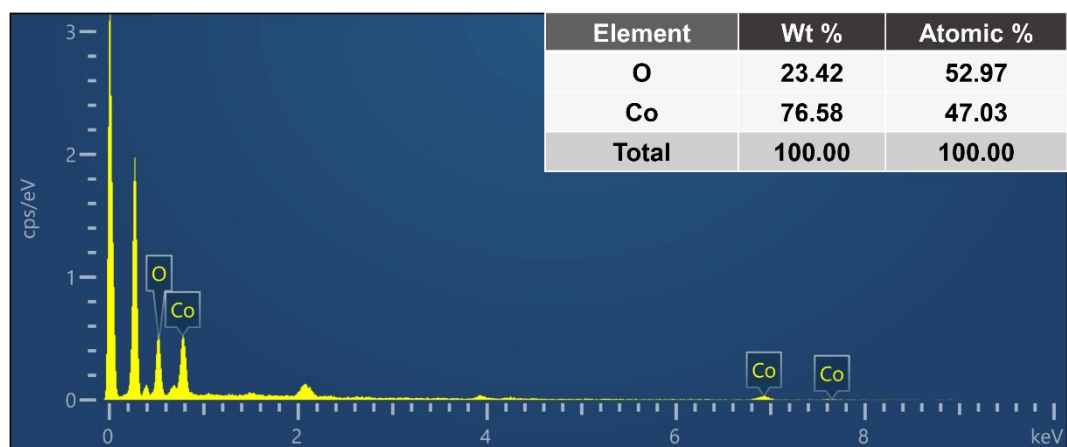

**Fig. S3.** EDX spectrum of CoO@NCNT/GP.



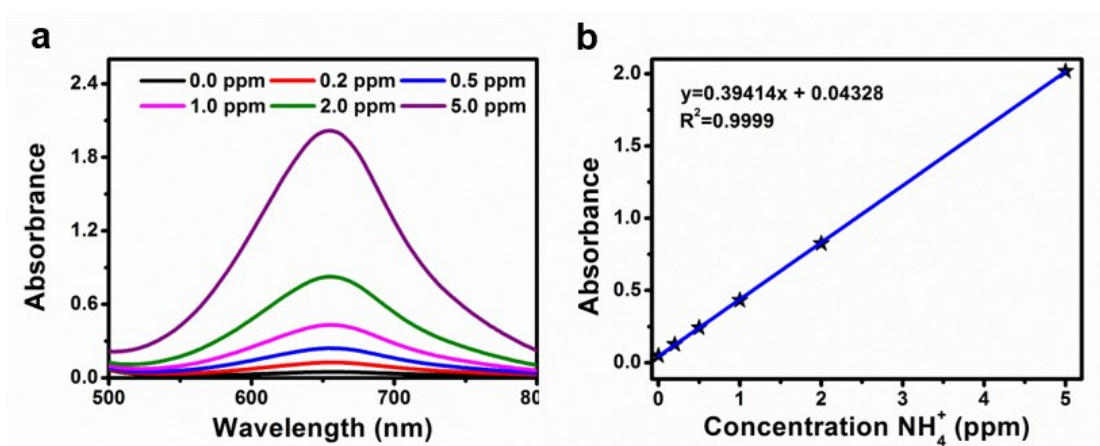

**Fig. S4.** (a) UV-Vis absorption spectra of different concentrations of  $\text{NH}_3$  stained with indophenol blue method. (b) Calibration curve used to calculation of  $\text{NH}_3$  concentration.

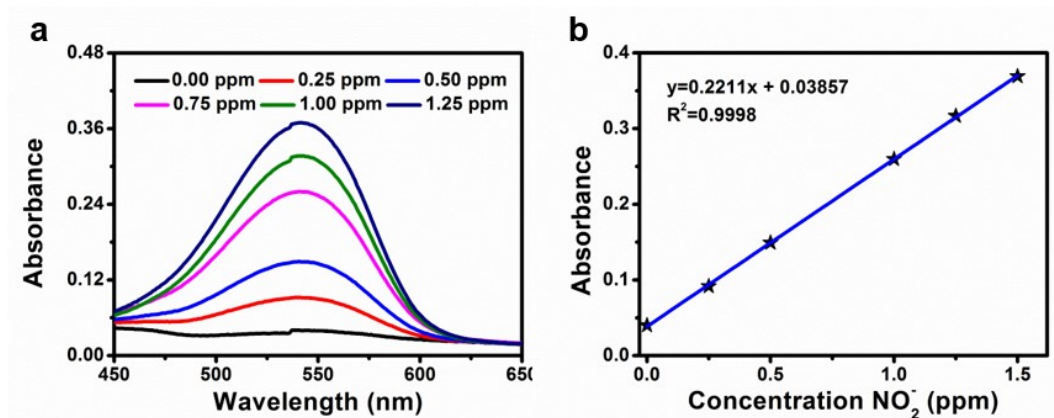

**Fig. S5.** (a) UV-Vis absorption spectra of different concentrations of  $\text{NO}_2^-$  using Griess method. (b) Calibration curve used to calculation of  $\text{NO}_2^-$  concentration.

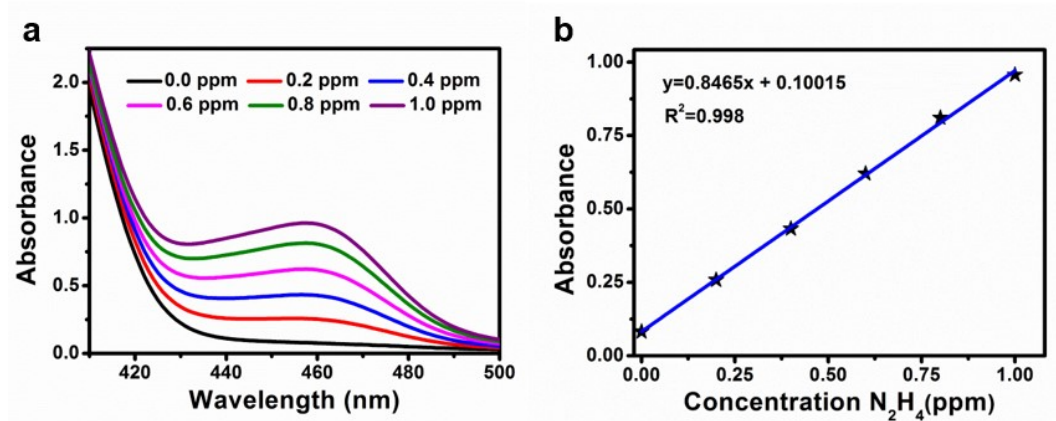

**Fig. S6.** (a) UV-Vis absorption spectra of different concentrations of  $\text{N}_2\text{H}_4$  by Watt and Chrisp method. (b) Calibration curve used to calculation of  $\text{N}_2\text{H}_4$  concentration.

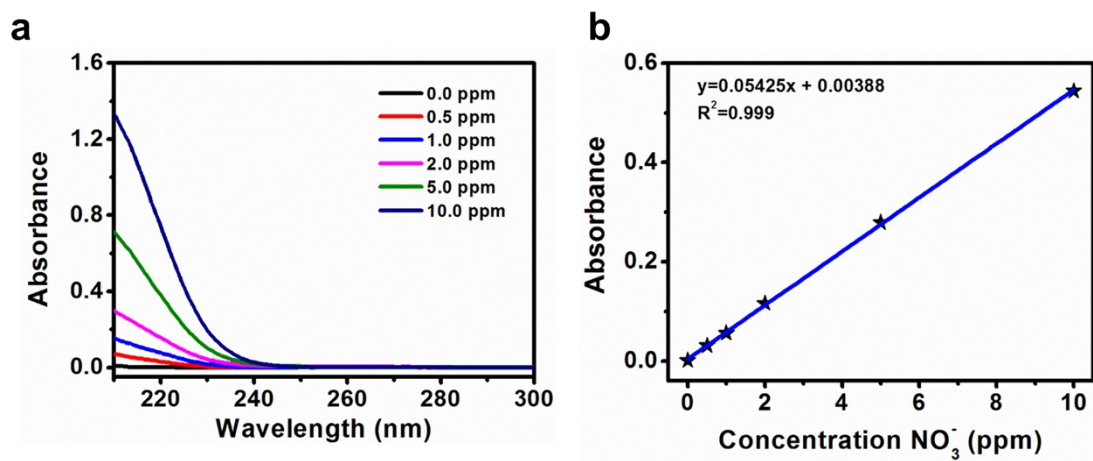

**Fig. S7.** (a) UV-Vis absorption spectra of different concentrations of  $\text{NO}_3^-$ . (b) Calibration curve used for calculation of  $\text{NO}_3^-$  concentration.

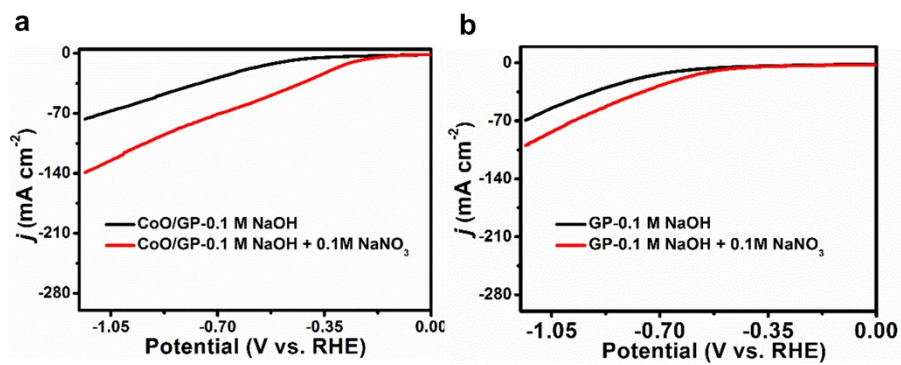

**Fig. S8.** LSV curves of (a) CoO/GP and (b) bare GP in 0.1 M NaOH solution with and without  $\text{NO}_3^-$ .

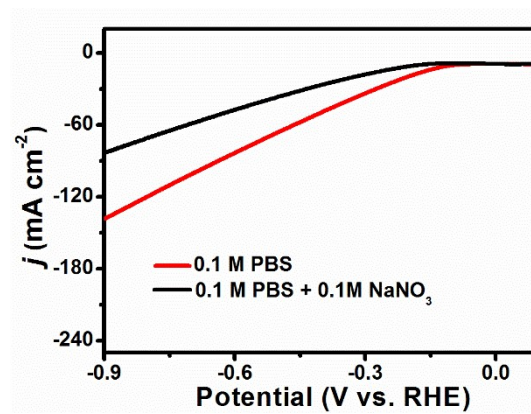

**Fig. S9.** LSV curves of CoO@NCNT/GP in 0.1 M PBS with and without NO<sub>3</sub><sup>-</sup>.

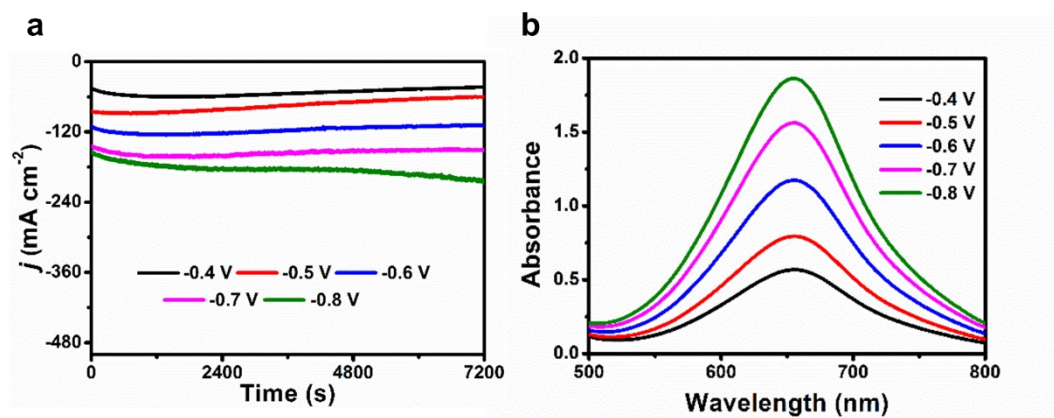

**Fig. S10.** (a) Chronoamperometry curves and (b) UV-Vis absorption spectra for CoO@NCNT/GP at different potentials in 0.1 M NaOH with 0.1 M NO<sub>3</sub><sup>-</sup>.

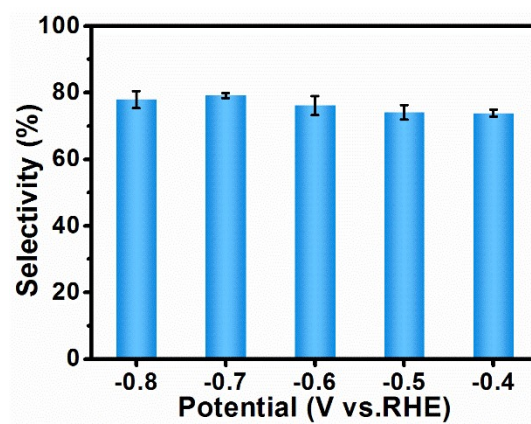

**Fig. S11.** Selectivity for  $\text{NH}_3$  at different potentials.



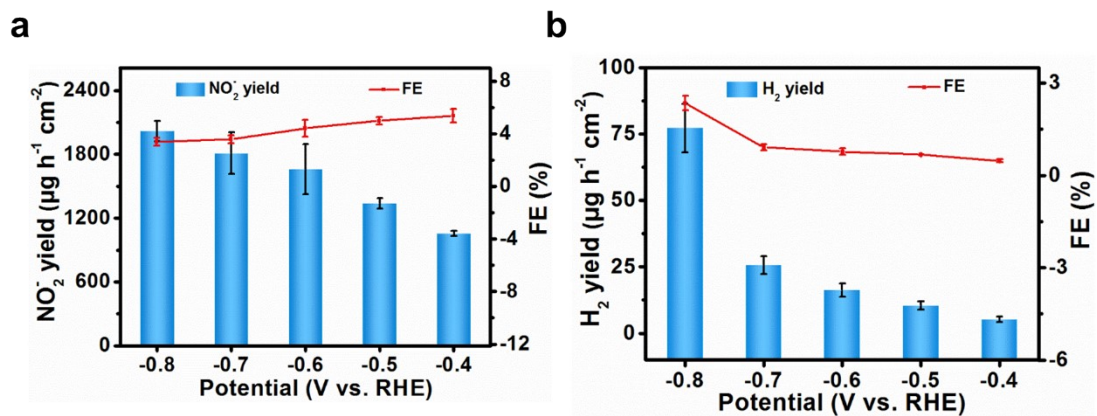

**Fig. S12.** FEs and yields of (a) NO<sub>2</sub><sup>-</sup> and (b) H<sub>2</sub> at different applied potentials.

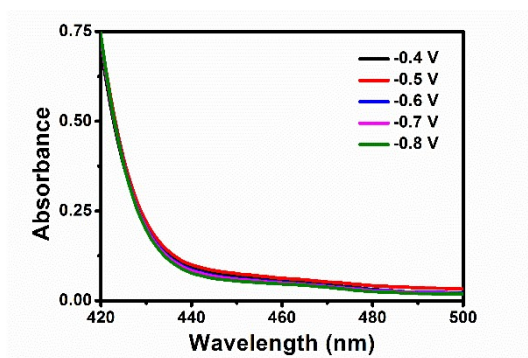

**Fig. S13.** UV-Vis absorption spectra of produced  $N_2H_4$  at different potentials.

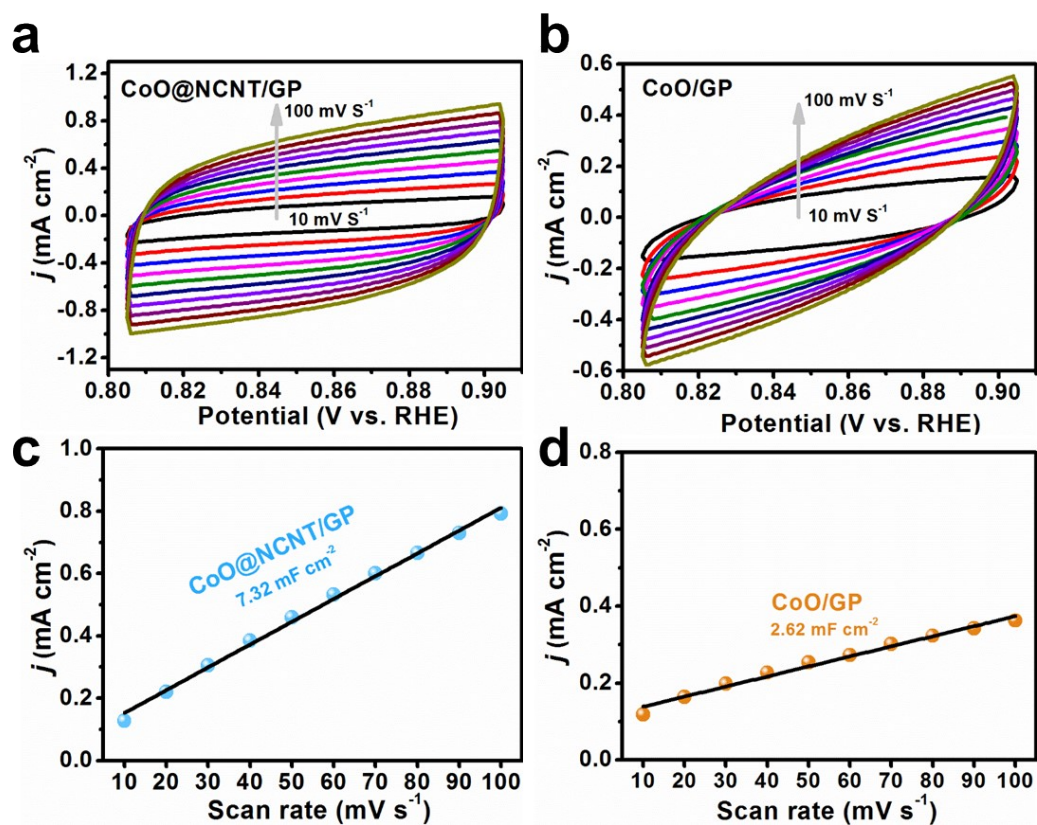

**Fig. S14.** CV curves for (a) CoO@NCNT/GP and (b) CoO /GP in the double layer region of 0.805–0.905 V at various scan rates. Capacitive current of (c) CoO@NCNT/GP and (d) CoO/GP as function of scan rate at 0.855 V.

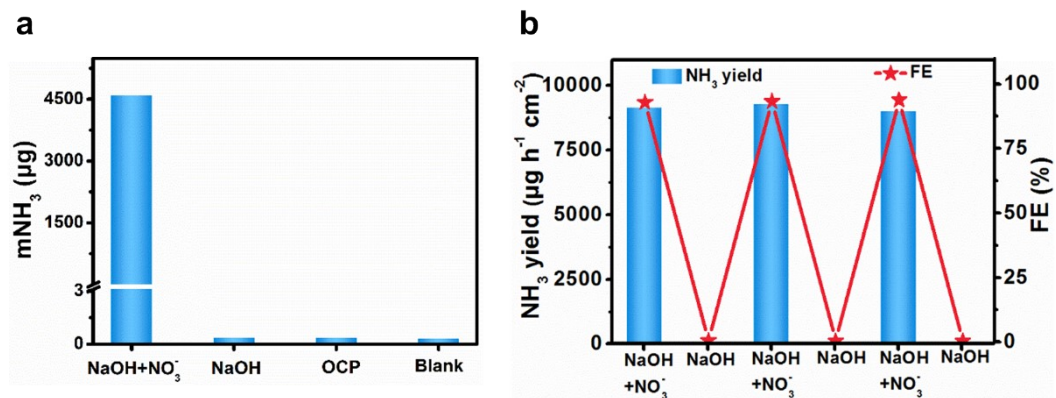

**Fig. S15.** (a) Amounts of produced NH<sub>3</sub> comparison under different conditions. (b) NH<sub>3</sub> yields and FEs during the alternating tests between 0.1 M NaOH with/without NO<sub>3</sub><sup>-</sup> at -0.6 V.

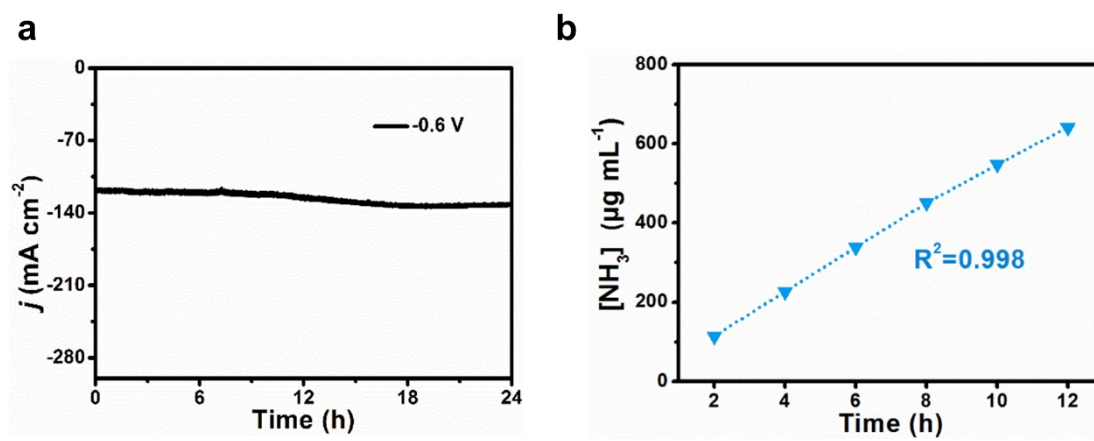

**Fig. S16.** (a) Chronoamperometry curve of 24 h electrolysis and (b) linear relationship between the produced  $\text{NH}_3$  and the electrolysis time during the long-term test.

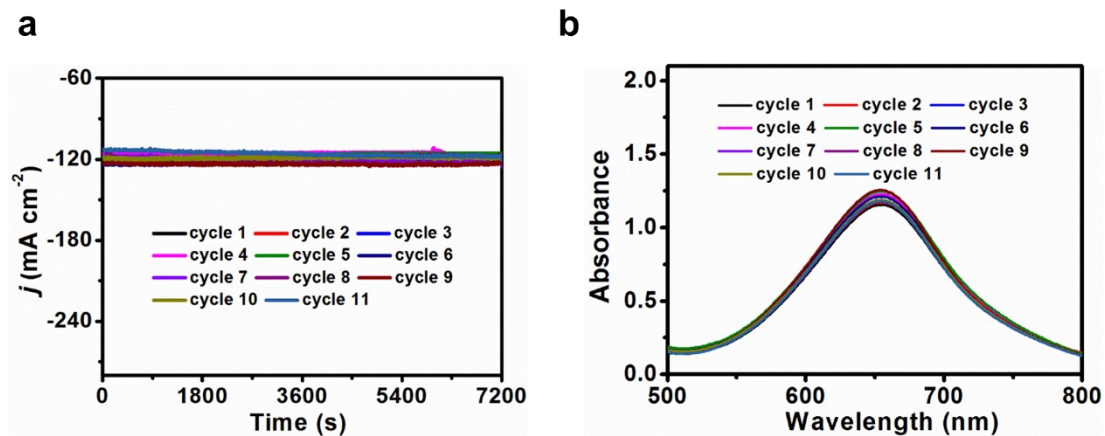

**Fig. S17.** (a) Chronoamperometry curves and (b) corresponding UV-Vis spectra of CoO@NCNT/GP during cycling tests at  $-0.6$  V in  $0.1$  M NaOH with  $0.1$  M  $\text{NO}_3^-$ .

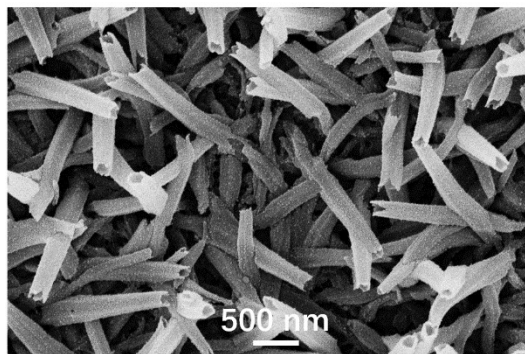

**Fig. S18.** SEM image for CoO@NCNT/GP after stability test.

**Table S1.** Comparison of electrocatalytic NO<sub>3</sub>RR performance for CoO@NCNT/GP with other electrocatalysts under ambient conditions.

| Catalyst                           | Electrolyte                                                                      | NH <sub>3</sub> yield<br>( $\mu\text{g h}^{-1} \text{ cm}^{-2}$ ) | FE               | Ref.      |
|------------------------------------|----------------------------------------------------------------------------------|-------------------------------------------------------------------|------------------|-----------|
| CoO@NCNT/GP                        | 0.1 M NaOH<br>(0.1 M NO <sub>3</sub> <sup>-</sup> )                              | 9041.6 $\pm$ 370.7                                                | 93.8 $\pm$ 1.5 % | This work |
| Co/CoO NSA                         | 0.1 M Na <sub>2</sub> SO <sub>4</sub><br>(200 ppm NO <sub>3</sub> <sup>-</sup> ) | 3305                                                              | 93.8 %           | 14        |
| Co-P/TP                            | 0.2 M Na <sub>2</sub> SO <sub>4</sub><br>(200 ppm NO <sub>3</sub> <sup>-</sup> ) | 416.0 $\pm$ 7.2                                                   | 93.6 $\pm$ 3.3 % | 15        |
| Fe SAC                             | 0.1 M K <sub>2</sub> SO <sub>4</sub><br>(0.5 M NO <sub>3</sub> <sup>-</sup> )    | 7820                                                              | 75.0 %           | 16        |
| Fe <sub>3</sub> O <sub>4</sub> /SS | 0.1 M NaOH<br>(0.1 M NO <sub>3</sub> <sup>-</sup> )                              | 10145                                                             | 91.6 %           | 17        |
| Fe-PPy-SACs                        | 0.1 M KOH<br>(0.1 M NO <sub>3</sub> <sup>-</sup> )                               | 2749                                                              | ~100 %           | 18        |
| Cu <sub>50</sub> Ni <sub>50</sub>  | 0.1 M KOH<br>(0.1 M NO <sub>3</sub> <sup>-</sup> )                               | -                                                                 | 84.0 %           | 19        |
| Cu <sub>3</sub> P NA/CF            | 0.1 M PBS<br>(0.1 M NO <sub>3</sub> <sup>-</sup> )                               | 848                                                               | 62.9 %           | 20        |
| Cu/Cu <sub>2</sub> O NWAs          | 0.5 M Na <sub>2</sub> SO <sub>4</sub><br>(200 ppm NO <sub>3</sub> <sup>-</sup> ) | 4148                                                              | 95.8 %           | 21        |
| TiO <sub>2-x</sub>                 | 0.5 M Na <sub>2</sub> SO <sub>4</sub><br>(400 ppm NO <sub>3</sub> <sup>-</sup> ) | 770                                                               | 87.1%            | 22        |



## References

- 1 C. Yang, H. Zhang, K. Yu, S. Xie, H. Tong, Y. Song, G. Shi, H. Gu, C. Chen and L Zhang, *ACS Appl. Energy Mater.*, 2020, **3**, 2010–2019.
- 2 D. Zhu, L. Zhang, R. E. Ruther and R. J. Hamers, *Nat. Mater.*, 2013, **12**, 836–841.
- 3 P. Li, Z. Jin, Z. Fang and G. Yu, *Energy Environ. Sci.*, 2021, **14**, 3522–3531.
- 4 G. W. Watt and J. D. Chrisp, *Anal. Chem.*, 1952, **24**, 2006–2008.
- 5 G. Kresse and J. Furthmüller, *Phys. Rev. B*, 1996, **54**, 11169.
- 6 G. Kresse and J. Furthmüller, *J. Comp. Mater. Sci.*, 1996, **6**, 15–50.
- 7 G. Kresse and J. Hafner, *Phys. Rev. B*, 1994, **49**, 14251–14269.
- 8 M. Segall, P. J. Lindan, M. a. Probert, C. J. Pickard, P. J. Hasnip, S. Clark and M. Payne, *J. Phys-Condens Mat.*, 2002, **14**, 2717.
- 9 P. E. Blöchl, *Phys. Rev. B*, 1994, **50**, 17953.
- 10 J. P. Perdew, J. A. Chevary, S. H. Vosko, K. A. Jackson, M. R. Pederson, D. J. Singh and C. Fiolhais, *Phys. Rev. B*, 1992, **46**, 6671.
- 11 S. Grimme, J. Antony, S. Ehrlich and H. A. Krieg, *J. Chem. Phys.*, 2010, **132**, 154104.
- 12 H. J. Monkhorst and J. D. Pack, *Phys. Rev. B*, 1976, **13**, 5188.
- 13 J. Norskov, J. Rossmeisl, A. Logadottir, L. Lindqvist, J. Kitchin, T. Bligaard, and H. Jonsson, *J. Phys. Chem. B*, 2004, **108**, 17886–17892.
- 14 Y. Wang, C. Liu, B. Zhang and Y. Yu, *Sci. China Mater.* 2020, **63**, 2530–2538.
- 15 Y. Yu, C. Wang, Y. Yu, Y. Wang and B. Zhang, *Sci. China Chem.*, 2020, **63**, 1469–1476.
- 16 X. Fu, X. Zhao, X. Hu, K. He, Y. Yu, T. Li, Q. Tu, X. Qian, Q. Yue, M. R. Wasielewski and Y. Kang, *Appl. Mater. Today*, 2020, **19**, 100620.
- 17 R. Jia, Y. Wang, C. Wang, Y. Ling, Y. Yu and B. Zhang, *ACS Catal.*, 2020, **10**, 3533–3540.
- 18 G. Chen, Y. Yuan, H. Jiang, S. Ren, L. Ding, L. Ma, T. Wu, J. Lu and H. Wang, *Nat. Energy*, 2020, **5**, 605–613.

- 19 Y. Wang, W. Zhou, R. Jia, Y. Yu and B. Zhang, *Angew. Chem., Int. Ed.*, 2020, **59**, 5350–5354.
- 20 Y. Huang, J. Long, Y. Wang, N. Meng, Y. Yu, S. Lu, J. Xiao and B. Zhang, *ACS Appl. Mater. Interfaces*, 2021, **13**, 54967–54973.
- 21 F. Lei, W. Xu, J. Yu, K. Li, J. Xie, P. Hao, G. Cui and B. Tang, *Chem. Eng. J.*, 2021, **426**, 131317.
- 22 D. Reyter, G. Chamoulaud, D. Bélanger and L. Roué, *J. Electroanal. Chem.*, 2006, **596**, 13–24.
- 23 Y. Wang, A. Xu, Z. Wang, L. Huang, J. Li, F. Li, J. Wicks, M. Luo, D. H. Nam, C. Tan, Y. Ding, J. Wu, Y. Lum, C. T. Dinh, D. Sinton, G. Zheng and E. H. Sargent, *J. Am. Chem. Soc.*, 2020, **142**, 5702–5708.
